# Supplementary material for: The Effect of an Attenuated Live Vaccine against Salmonid Rickettsial Septicemia in Atlantic Salmon (Salmo salar) Is Highly Dependent on Water Temperature during Immunization
Source: MDPI journal article supplement (doi:10.3390/vaccines12040416), 2024-04-15
Supplement: s1 [file s1]

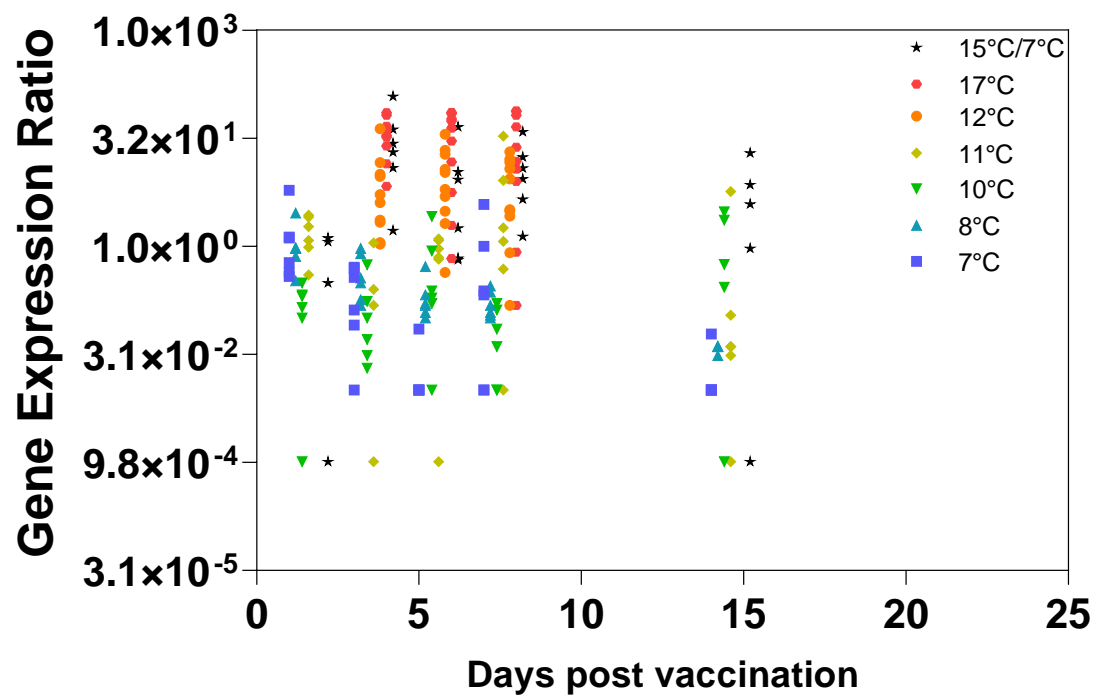

**Figure S1.** Normalized expression of *P. salmonis* RNA in livers from fish vaccinated and immunized at different temperatures. The figure is based on the Ct-values presented in Figure 5a normalized against corresponding Ct-values from the internal reference gene Elongation factor 1a from the same sample using the method outlined by Pfaffl et al 2001.
